# Supplementary material for: Orthogeriatric multidisciplinary care for hip fractures in emergency department reduces length of stay: a retrospective cohort study
Source: Research Square preprint supplement (doi:10.21203/rs.3.rs-7650205/v1), 2025-09-23
Supplement: Supplementary file 1 [file 69a24e862b265bef0e39b4e3.docx]

**Standard Operating Procedure (SOP): Regional anaesthesia for hip fracture with femoral nerve blockade**

**Positioning**

The patient is placed in supine position. The anaesthesiologist stands at the hip on the side of the puncture, while the ultrasound device is positioned at hip level on the opposite side.

**Equipment**

An ultrasound machine is used with a linear probe. Disinfection is made with a Chlorhexidine 2% solution. Sterile procedure is ensured by utilisation of sterile filed, sterile gloves, sterile contact gel and sterile protective cover for ultrasound probe. Puncture is made with a 22G x 50 mm needle. If a catheter is desired, a 21G x 50mm needle with 21G x 400 mm catheter is used. The regional anaesthesia is made by the utilisation of 20 ml of Ropivacaine 0.5% (Maximum dose of ropivacaine: 3 mg/kg).

**RA technique**

For femoral nerve single shot blockade, the puncture is made through an in-plane technique. For femoral nerve catheter placement, an out-of-plane puncture is made allowing the catheter to follow the path of the femoral nerve. First, the femoral artery and vein (at the point where the superficial femoral artery and deep femoral artery are joining) as well as the femoral nerve under the iliac fascia are visualized. Then, the injection of the local aesthetic is made under the iliac fascia, at the lateral edge of the nerve.
